# Supplementary material for: Prediction and Analysis of the Protein Interactome in Pseudomonas aeruginosa to Enable Network-Based Drug Target Selection
Source: PLoS One. 2012 Jul 24;7(7):e41202. doi: 10.1371/journal.pone.0041202 (PMC3404098; doi:10.1371/journal.pone.0041202)
Supplement: Table S9 — Over-represented functions by PA proteins involved in mucA, mucB-related PPIs and rhlR-related PPIs. The top significantly enriched GO functional annotations are high-lighted. (XLSX) [file pone.0041202.s012.xlsx]

## Sheet: Table s9a_mucAB_partners
Table S9a. Over-represented functions by mucA, mucB, and their predicted interacting partners
GO_term	Description	Category	p-value
GO:0009276	Gram-negative-bacterium-type cell wall	C	4.38e-09
GO:0030288	outer membrane-bounded periplasmic space	C	0.41871
GO:0009288	bacterial-type flagellum	C	0.493039
GO:0016020	membrane	C	1
GO:0016989	sigma factor antagonist activity	F	0.00225602
GO:0030528	transcription regulator activity	F	0.0105343
GO:0003774	motor activity	F	0.0480888
GO:0008666	2,3,4,5-tetrahydropyridine-2,6-dicarboxylate N-succinyltransferase activity	F	0.0480888
GO:0008759	UDP-3-O-[3-hydroxymyristoyl] N-acetylglucosamine deacetylase activity	F	0.0480888
GO:0008879	glucose-1-phosphate thymidylyltransferase activity	F	0.0480888
GO:0003977	UDP-N-acetylglucosamine diphosphorylase activity	F	0.0480888
GO:0019171	3-hydroxyacyl-[acyl-carrier-protein] dehydratase activity	F	0.0480888
GO:0004252	serine-type endopeptidase activity	F	0.0480888
GO:0016798	hydrolase activity, acting on glycosyl bonds	F	0.0480888
GO:0008460	dTDP-glucose 4,6-dehydratase activity	F	0.0480888
GO:0008446	GDP-mannose 4,6-dehydratase activity	F	0.0939215
GO:0008881	glutamate racemase activity	F	0.0939215
GO:0000156	two-component response regulator activity	F	0.10973
GO:0003824	catalytic activity	F	0.247175
GO:0003674	molecular_function	F	0.874257
GO:0009103	lipopolysaccharide biosynthetic process	P	8.3e-08
GO:0006355	regulation of transcription, DNA-dependent	P	0.000133814
GO:0042121	alginic acid biosynthetic process	P	0.00180543
GO:0019305	dTDP-rhamnose biosynthetic process	P	0.00395415
GO:0000271	polysaccharide biosynthetic process	P	0.0264407
GO:0045449	regulation of transcription	P	0.0380462
GO:0006950	response to stress	P	0.0772942
GO:0009245	lipid A biosynthetic process	P	0.0772942
GO:0006935	chemotaxis	P	0.121702
GO:0006013	mannose metabolic process	P	0.148756
GO:0043093	binary fission	P	0.167682
GO:0005975	carbohydrate metabolic process	P	0.171355
GO:0006000	fructose metabolic process	P	0.171355
GO:0009089	lysine biosynthetic process via diaminopimelate	P	0.193369
GO:0000160	two-component signal transduction system (phosphorelay)	P	0.245915
GO:0006508	proteolysis	P	0.256048
GO:0006928	cellular component movement	P	0.325726
GO:0001539	ciliary or flagellar motility	P	0.432566
GO:0050896	response to stimulus	P	0.60429
GO:0044255	cellular lipid metabolic process	P	0.729495
GO:0044248	cellular catabolic process	P	0.875756
GO:0006810	transport	P	0.992348
GO:0006520	cellular amino acid metabolic process	P	0.997138

## Sheet: Table_s9b_rhlR_partners
Table S9b. Over-represented functions by rhlR, and its predicted interacting partners
GO_term	Description	Category	p-value
GO:0009288	bacterial-type flagellum	C	0.669653
GO:0009276	Gram-negative-bacterium-type cell wall	C	1
GO:0030528	transcription regulator activity	F	2.47e-26
GO:0000156	two-component response regulator activity	F	7.96e-09
GO:0005525	GTP binding	F	0.0302661
GO:0008168	methyltransferase activity	F	0.0752158
GO:0008812	choline dehydrogenase activity	F	0.0752158
GO:0003908	methylated-DNA-[protein]-cysteine S-methyltransferase activity	F	0.0752158
GO:0030551	cyclic nucleotide binding	F	0.0752158
GO:0004536	deoxyribonuclease activity	F	0.0752158
GO:0008934	inositol-1(or 4)-monophosphatase activity	F	0.0752158
GO:0008785	alkyl hydroperoxide reductase activity	F	0.14486
GO:0016987	sigma factor activity	F	0.26903
GO:0003674	molecular_function	F	0.96279
GO:0006355	regulation of transcription, DNA-dependent	P	1.38e-37
GO:0000160	two-component signal transduction system (phosphorelay)	P	3.11e-10
GO:0050896	response to stimulus	P	2.75e-07
GO:0030092	regulation of flagellum assembly	P	0.00168342
GO:0045449	regulation of transcription	P	0.0113435
GO:0006020	inositol metabolic process	P	0.0413559
GO:0030152	bacteriocin biosynthetic process	P	0.0413559
GO:0009118	regulation of nucleoside metabolic process	P	0.0413559
GO:0001906	cell killing	P	0.0413559
GO:0001539	ciliary or flagellar motility	P	0.0526521
GO:0006935	chemotaxis	P	0.0661513
GO:0006796	phosphate metabolic process	P	0.0810284
GO:0006808	regulation of nitrogen utilization	P	0.119085
GO:0006352	transcription initiation	P	0.119085
GO:0002049	pyoverdine biosynthetic process	P	0.119085
GO:0006113	fermentation	P	0.15559
GO:0006817	phosphate transport	P	0.224194
GO:0008150	biological_process	P	0.323718
GO:0006281	DNA repair	P	0.323718
GO:0009296	flagellum assembly	P	0.345364
GO:0006560	proline metabolic process	P	0.372622
GO:0006525	arginine metabolic process	P	0.372622
GO:0006928	cellular component movement	P	0.386007
GO:0009297	pilus assembly	P	0.398763
GO:0019439	aromatic compound catabolic process	P	0.447871
GO:0006260	DNA replication	P	0.514225
GO:0006807	nitrogen compound metabolic process	P	0.554036
GO:0006259	DNA metabolic process	P	0.840299
GO:0044248	cellular catabolic process	P	0.920785
GO:0046903	secretion	P	0.939675
GO:0009117	nucleotide metabolic process	P	0.942285
GO:0006091	generation of precursor metabolites and energy	P	0.99906
GO:0044267	cellular protein metabolic process	P	0.999517
GO:0006520	cellular amino acid metabolic process	P	0.999903
